# Supplementary material for: FcRn Rescues Recombinant Factor VIII Fc Fusion Protein from a VWF Independent FVIII Clearance Pathway in Mouse Hepatocytes
Source: PubMed Central journal article supplement (PMC4408089; doi:10.1371/journal.pone.0124930), 2015-04-23
Supplement: pone.0124930.s012.pdf [file pone.0124930.s012.pdf]

**S1 Table. Antibodies used for immunohistochemistry and FACS**

| <b>Murine antigen</b> | <b>Species</b> | <b>Clone</b> | <b>Vendor</b>    | <b>Catalog number</b> | <b>Dilution</b>               |
|-----------------------|----------------|--------------|------------------|-----------------------|-------------------------------|
| CD16/32               | rat            | 2.4G2        | BD Biosciences   | 553140                | 1:100, blocking               |
| CD45.1/Ly5.1          | mouse          | A20          | BD Biosciences   | 553775                | 1:100                         |
| CD45.2/Ly5.2          | mouse          | 104          | BD Biosciences   | 558702                | 1:100                         |
| CD90.1/Thy1.1         | rat            | OX-7         | BD Biosciences   | 554897                | 1:100                         |
| CD90.2/Thy1.2         | rat            | 535-2.1      | BD Biosciences   | 553007                | 1:100                         |
| F4/80                 | rat            | BM8          | eBiosciences     | 53-4801/50-4801       | 1:20 (IHC)                    |
| F4/80                 | rat            | CI:A3-1      | AbD Serotec      | MCA497A647, A488      | 1:100 (FACS)<br>1:10 (IHC)    |
| CD68                  | rat            | FA-11        | AbD Serotec      | MCA1957A488           | 1:10 with 2 <sup>nd</sup> Ab  |
| CD31                  | rat            | ER-MP12      | AbD Serotec      | MCA2388A488           | 1:100 with 2 <sup>nd</sup> Ab |
| CD31                  | rat            | 390          | BD Biosciences   | 553708                | 1:50 with 2 <sup>nd</sup> Ab  |
| VWF                   | rabbit         |              | Abcam            | ab6994                | 1:400                         |
| Iba1                  | rabbit         |              | Wako             | 019-19741             | 1:800<br>(paraformaldehyde)   |
| human FVIII-A1        | mouse          |              | Green Mountain   | GMA8004               | 1:400 with anti-IgG2          |
| human FVIII-A2        | mouse          |              | Green Mountain   | GMA8009               | 1:400                         |
| Human FVIII-C2        | mouse          |              | Green Mountain   | GMA8018               | 1:400                         |
| Human FVIII-C2        | mouse          |              | Green Mountain   | GMA8019               | 1:400                         |
| Moma-1/CD169          | rat            | Moma-1       | AbD Serotec      | MCA947                | 1:10                          |
| Marco                 | rat            | ED31         | AbD Serotec      | MCA1849               | 1:100                         |
| mouse IgG2a           | goat           |              | Molecular Probes | A21131, A21135        | 1:200 (FVIII IHC)             |
| rat-IgG               | goat           |              | Molecular Probes | A11006, A1107, A21247 | 1:200                         |
| rabbit-IgG            | goat           |              | Molecular Probes | A11013, A21244        | 1:200                         |
| human-IgG             | goat           |              | Molecular Probes | A11013                | 1:200                         |
