# Supplementary material for: FcRn Rescues Recombinant Factor VIII Fc Fusion Protein from a VWF Independent FVIII Clearance Pathway in Mouse Hepatocytes
Source: PubMed Central journal article supplement (PMC4408089; doi:10.1371/journal.pone.0124930), 2015-04-23
Supplement: pone.0124930.s013.pdf [file pone.0124930.s013.pdf]

**S2 Table. LifeTechnologies qPCR primers for liver cell analysis**

| <b>Murine Gene - Molecule</b>                              | <b>Probe Order Number</b> |
|------------------------------------------------------------|---------------------------|
| Fcgrt - IgG receptor FcRn large subunit                    | Mm00438887_m1             |
| VWF - von Willibrand Factor                                | Mm00550376_m1             |
| F8 – Factor VIII                                           | Mm01215672_m1             |
| LRP - Lrp1b                                                | Mm00466712_m1             |
| LDLR - Low density lipoprotein receptor                    | Mm00440169_m1             |
| Asgr-1 - Asialoglycoprotein receptor                       | Mm01245581_m1             |
| Stab2 - Stabilin-2                                         | Mm00454684_m1             |
| CD209a – DC-SIGN, DC-specific ICAM-3-grabbing non-integrin | Mm00460067_m1             |
| Scara5 - Scavenger receptor-5                              | Mm00512272_m1             |
| CLEC4F - C-type lectin domain family 4, member F           | Mm00443934_m1             |
| Siglec5 - Sialic acid binding Ig-like lectin 5             | Mm00473131_m1             |
| Alb - Albumin                                              | Mm00802090_m1             |
| LYVE-1 - Lymphatic vessel endothelial HA receptor-1        | Mm00475056_m1             |
| Emr-1, (F4/80) - Emerin homolog 1                          | Mm00802529_m1             |
| CD68 - Macrosialin                                         | Mm03047340_m1             |
| GAPDH - Glyceraldehyde-3-phosphate dehydrogenase           | Mm9999915_g1              |
| B2m - $\beta$ 2 microglobulin                              | Mm00437762_m1             |
