# Supplementary material for: FcRn Rescues Recombinant Factor VIII Fc Fusion Protein from a VWF Independent FVIII Clearance Pathway in Mouse Hepatocytes
Source: PubMed Central journal article supplement (PMC4408089; doi:10.1371/journal.pone.0124930), 2015-04-23
Supplement: pone.0124930.s014.pdf [file pone.0124930.s014.pdf]

**S3 Table. Biodistribution of rFVIII<sup>h</sup>Fc or rFVIII as calculated as %ID/organ by QWBA or scintillation counting FVIII-KO mice**

| FVIII-KO Mice      | rFVIII <sup>h</sup> Fc by QWBA (%ID/organ) |              |              |             |             | rFVIII <sup>h</sup> Fc by Scintillation Counts (%ID/organ) |                    |                    | rFVIII by Scintillation Counts (%ID/organ) |                    |
|--------------------|--------------------------------------------|--------------|--------------|-------------|-------------|------------------------------------------------------------|--------------------|--------------------|--------------------------------------------|--------------------|
|                    | Organ                                      | 5 min        | 30 min       | 3 hr        | 16 hr       | 32 hr                                                      | 5 min              | 15 min             | 2 hr                                       | 15 min             |
| Blood              | <b>36.09</b>                               | <b>34.08</b> | <b>26.59</b> | <b>2.91</b> | <b>3.53</b> | <b>67.05 ±7.68</b>                                         | <b>50.92 ±4.93</b> | <b>35.9 6±1.99</b> | <b>55.71 ±2.48</b>                         | <b>56.17 ±6.49</b> |
| Liver              | 7.22                                       | 11.13        | 9.07         | 1.27        | 1.01        | 12.72 ±0.44                                                | 12.35 ±0.64        | 6.16 ±0.61         | 11.31 ±0.63                                | 4.62 ±2.12         |
| Kidney             | 2.04                                       | 2.10         | 2.38         | 0.71        | 0.79        | 3.58 ±0.32                                                 | 3.0 ±0.11          | 2.38 ±0.37         | 2.85 ±0.11                                 | 2.57 ±0.03         |
| Lung               | 1.09                                       | 1.48         | 1.18         | 0.16        | 0.10        | 0.54 ±0.23                                                 | 0.42 ±0.03         | 0.32 ±0.02         | 0.23 ±0.05                                 | 0.41 ±0.38         |
| Muscle             | 3.12                                       | 2.95         | 3.63         | 0.89        | ND          | 5.48 ±1.24                                                 | 4.43 ±0.4          | 5.76 ±1            | 4.11 ±0.4                                  | 2.99±0.26          |
| Spleen             | 0.28                                       | 0.25         | 0.47         | 0.05        | 0.05        | 0.52 ±0.04                                                 | 0.4 ±0.09          | 0.54 ±0.07         | 0.45 ±0.18                                 | 0.49 ±0.1          |
| Heart              | 0.43                                       | 0.64         | 0.51         | 0.06        | 0.05        | 0.42 ±0.08                                                 | 0.25 ±0.14         | 0.32 ±0.01         | 0.29 ±0.05                                 | 0.25 ±0.07         |
| <b>Total (%ID)</b> | <b>50.27</b>                               | <b>52.63</b> | <b>43.83</b> | <b>6.05</b> | <b>5.53</b> | <b>90.28 ±10</b>                                           | <b>71.87±6.35</b>  | <b>51.53 ±4.09</b> | <b>75 ±3.9</b>                             | <b>67.54 ±9.45</b> |
| Urine              |                                            |              |              |             |             | 0.96±0.31                                                  | 0.88±0.20          | 10                 | 6.88±5.65                                  | 7.98±8.54          |
