# Supplementary material for: FcRn Rescues Recombinant Factor VIII Fc Fusion Protein from a VWF Independent FVIII Clearance Pathway in Mouse Hepatocytes
Source: PubMed Central journal article supplement (PMC4408089; doi:10.1371/journal.pone.0124930), 2015-04-23
Supplement: pone.0124930.s015.pdf [file pone.0124930.s015.pdf]

**S4 Table. Percentage of injected dose per gram of tissue (%ID/g) for rFVIII<sub>h</sub>Fc or rFVIII as determined by QWBA or scintillation counting FVIII-KO mice**

| FVIII-KO Mice   | rFVIII <sub>h</sub> Fc by QWBA (%ID/g) |        |       |       |       | rFVIII <sub>h</sub> Fc by Scintillation Counts (%ID/g) |           |          | rFVIII by Scintillation Counts (%ID/g) |            |
|-----------------|----------------------------------------|--------|-------|-------|-------|--------------------------------------------------------|-----------|----------|----------------------------------------|------------|
|                 | 5 min                                  | 30 min | 3 hr  | 16 hr | 32 hr | 5 min                                                  | 15 min    | 2 hr     | 15 min                                 | 1 hr       |
| Blood           | 32.69                                  | 19.86  | 16.29 | 1.72  | 2.18  | 38.7±3.8                                               | 36.3±2.3  | 22.2±2.2 | 33.3±3.2                               | 34.1±3.6   |
| Liver           | 8.16                                   | 8.10   | 6.93  | 0.94  | 0.78  | 9.2±0.2                                                | 11±0.2    | 4.7±0.3  | 8.4±0.9                                | 3.5±1.6    |
| Kidney          | 9.87                                   | 6.53   | 7.79  | 2.22  | 2.58  | 11±0.8                                                 | 11.4±0.1  | 7.8±0    | 9.1±0.8                                | 8.3±0      |
| Lung            | 14.15                                  | 12.35  | 10.36 | 1.32  | 0.90  | 4.4±1.8                                                | 4.3±0.4   | 2.8±0.3  | 2.0±0.5                                | 3.6±3.4    |
| Muscle          | 0.57                                   | 0.34   | 0.44  | 0.1   | ND    | 0.6±0.1                                                | 0.6±0.1   | 0.7±0    | 0.5±0                                  | 0.4±0      |
| Spleen          | 4.83                                   | 2.76   | 5.47  | 0.56  | 0.55  | 5.7±0.5                                                | 5.4±1.5   | 6.3±0.1  | 5.1±1.8                                | 5.7±1.2    |
| Heart           | 7.3                                    | 6.95   | 05.87 | 0.63  | 0.56  | 4.5±0.9                                                | 3.2±1.7   | 3.7±0.7  | 3.2±0.7                                | 2.8±0.8    |
|                 |                                        |        |       |       |       |                                                        |           |          |                                        |            |
| Bile            | 2.86                                   | 5.16   | 13.50 | 0.63  | 0.84  | ND                                                     | ND        | ND       | ND                                     | ND         |
| Cecum           | 0.23                                   | 0.34   | 9.97  | 0.42  | 0.31  | ND                                                     | ND        | ND       | ND                                     | ND         |
| Large intestine | 0.69                                   | 0.73   | 1.37  | 0.86  | 0.27  | 0.6±0.2                                                | 2.1±2.0   | 1.7±0    | 0.7±0                                  | 0.5±0.1    |
| Urine           | 14.11                                  | 60.02  | ND    | 1.14  | 3.75  | 146.5±33                                               | 72.5±41.2 | 167.4±   | 238.6±143.2                            | 149.6±17.1 |
