# Supplementary material for: FcRn Rescues Recombinant Factor VIII Fc Fusion Protein from a VWF Independent FVIII Clearance Pathway in Mouse Hepatocytes
Source: PubMed Central journal article supplement (PMC4408089; doi:10.1371/journal.pone.0124930), 2015-04-23
Supplement: pone.0124930.s016.pdf [file pone.0124930.s016.pdf]

**S5 Table. Biodistribution of rFVIII Fc as calculated %ID/organ as determined by QWBA or scintillation counting in FVIII/VWF DKO Mice**

| FVIII/VWF<br>DKO mice | rFVIII Fc by QWBA<br>(%ID/organ) |              |              |              |             | rFVIII Fc by Scintillation Counts<br>(%ID/organ) |                   |
|-----------------------|----------------------------------|--------------|--------------|--------------|-------------|--------------------------------------------------|-------------------|
|                       | 5 min                            | 15 min       | 1 hr         | 2 hr         | 6 hr        | 5 min                                            | 15 min            |
| <b>Blood</b>          | <b>28.42</b>                     | <b>19.33</b> | <b>11.45</b> | <b>8.17</b>  | <b>3.24</b> | <b>41.89±1.18</b>                                | <b>33.15±1.12</b> |
| <b>Liver</b>          | <b>29.23</b>                     | <b>30.45</b> | <b>13.55</b> | <b>8.35</b>  | <b>2.92</b> | <b>25.49±1.55</b>                                | <b>25.22±5.28</b> |
| Kidney                | 1.63                             | 2.32         | 2.01         | 1.56         | 0.89        | 2.65±0.49                                        | 2.52±0.06         |
| Lung                  | 1.85                             | 0.88         | 0.57         | 0.40         | 0.17        | 0.28±0.09                                        | 0.24±0.07         |
| Muscle                | 3.59                             | 2.57         | 1.73         | 2.57         | 1.57        | 3.91±0.77                                        | 3.4±0.21          |
| Spleen                | 0.64                             | 0.68         | 0.43         | 0.24         | 0.09        | 0.74±0.14                                        | 0.65±0.2          |
| Heart                 | 0.61                             | 0.58         | 0.25         | 0.17         | 0.11        | 0.37±0.05                                        | 0.25±0.02         |
| <b>Total (%ID)</b>    | <b>65.97</b>                     | <b>56.81</b> | <b>29.99</b> | <b>21.46</b> | <b>8.99</b> | <b>75.5±4.32</b>                                 | <b>65.46±7.01</b> |
| Urine                 |                                  |              |              |              |             | 2.06±2.84                                        | 8.61±0.86         |
