# Supplementary material for: FcRn Rescues Recombinant Factor VIII Fc Fusion Protein from a VWF Independent FVIII Clearance Pathway in Mouse Hepatocytes
Source: PubMed Central journal article supplement (PMC4408089; doi:10.1371/journal.pone.0124930), 2015-04-23
Supplement: pone.0124930.s017.pdf [file pone.0124930.s017.pdf]

**S6 Table. Percentage of injected dose per gram of tissue (%ID/g) of rFVIII<sub>h</sub>Fc as determined by QWBA or scintillation counting in FVIII/VWF DKO Mice**

| FVIII/VWF<br>DKO mice | rFVIII <sub>h</sub> Fc by QWBA<br>(%ID/g) |              |             |             |             | rFVIII <sub>h</sub> Fc by Scintillation Counts<br>(%ID/g) |                 |
|-----------------------|-------------------------------------------|--------------|-------------|-------------|-------------|-----------------------------------------------------------|-----------------|
|                       | 5 min                                     | 15 min       | 1 hr        | 2 hr        | 16 hr       | 5 min                                                     | 15 min          |
| <b>Blood</b>          | <b>22.98</b>                              | <b>9.18</b>  | <b>5.91</b> | <b>4.04</b> | <b>1.51</b> | <b>19.9±0.9</b>                                           | <b>16.5±0.7</b> |
| <b>Liver</b>          | <b>29.50</b>                              | <b>18.04</b> | <b>8.73</b> | <b>5.16</b> | <b>1.70</b> | <b>15.1±0.7</b>                                           | <b>15.7±3.4</b> |
| Kidney                | 7.02                                      | 5.87         | 5.55        | 4.11        | 2.22        | 6.7±1.4                                                   | 6.7±0.1         |
| Lung                  | 21.35                                     | 5.94         | 4.18        | 2.83        | 1.13        | 1.9±0.6                                                   | 1.7±0.5         |
| Muscle                | 0.58                                      | 0.24         | 0.18        | 0.25        | 0.15        | 0.4±0.1                                                   | 0.3±0           |
| Spleen                | 9.93                                      | 6.14         | 4.20        | 2.24        | 0.81        | 6.7±1.4                                                   | 6.2±1.9         |
| Heart                 | 7.30                                      | 6.95         | 5.87        | 0.63        | 0.56        | 3.3±0.5                                                   | 2.3±0.2         |
|                       |                                           |              |             |             |             |                                                           |                 |
| Bile                  | 5.48                                      | 3.56         | 18.06       | 18.99       | 14.37       | ND                                                        | ND              |
| Cecum                 | 0.54                                      | 0.19         | 0.14        | 3.90        | 4.48        | ND                                                        | ND              |
| Large intestine       | ND                                        | 0.52         | 0.30        | 1.43        | 8.77        | 0.4±0                                                     | 0.4±0           |
| Urine                 | 55.24                                     | 50.20        | 3.55        | 99.22       | 4.84        | 43.3±53.8                                                 | 168.4±123.9     |
